# Supplementary material
Source: Copernicus journal article supplement (doi:10.5194/egqsj-10-81-1959)
Supplement: Supplementary file 1 [file egqsj-10-81-1959-supplement.pdf]

| 1                 | 2       | 3    | 4                   | 5                   | 6      | 7                 | 8        | 9        | 10                                                                                    | 11                                                                                      | 12                        | 13         | 14       | 15             | 16              | 17     | 18                     | 19                   | 20     | 21               | 22              | 23                    | 24    | 25             | 26    | 27 | 28 | 29 | 30                     | 31 |    |      |      |                   |      |      |     |        |                  |             |    |  |
|-------------------|---------|------|---------------------|---------------------|--------|-------------------|----------|----------|---------------------------------------------------------------------------------------|-----------------------------------------------------------------------------------------|---------------------------|------------|----------|----------------|-----------------|--------|------------------------|----------------------|--------|------------------|-----------------|-----------------------|-------|----------------|-------|----|----|----|------------------------|----|----|------|------|-------------------|------|------|-----|--------|------------------|-------------|----|--|
| Seenhöhe<br>in m. | Tiefe-m |      | Graph.<br>Darstell. | Proben-<br>entnahme | Schema | Index<br>bezeich. | Malakof. | Farbe    | Grundf. Charakter.                                                                    | Beimischungen                                                                           | T e x t u r               |            |          |                | S t r u k t u r |        |                        | Sekundäre<br>Aussch. |        | Schlamm-analyse  |                 |                       |       | Karbonatgehalt |       |    |    |    | Volumengewicht g/cm³:  |    |    |      |      | Glimmer           |      |      |     |        | Karbonatdetritus | Anmerkungen |    |  |
|                   |         |      |                     |                     |        |                   |          |          |                                                                                       |                                                                                         | Absonderu.<br>Aggregation | Leitbahnen |          |                |                 |        |                        |                      |        | Wendepunkt<br>KB |                 |                       |       | %              |       |    |    |    | Relative Humusgehalt % |    |    |      |      | Relat. Häufigkeit |      |      |     |        | 0,1 - 0,2 mm     |             |    |  |
|                   |         |      |                     |                     |        |                   |          |          |                                                                                       |                                                                                         | Typ                       | Häufgr.    | H. Größe | Grobe<br>Häuf. | Größe           | Typ    | Häufigste<br>Korngröße | Mikroporen           | Ca     | Fe, Mn           | Kat. I<br>0,001 | Kat. II<br>0,001-0,05 | 1/100 | 0,060 mm       | 0,120 | 5  | 10 | 15 | 20                     | 30 | 40 | 1,40 | 1,50 | 1,60              | 1,70 | 1,80 | 1   | 2      | 3                | 4           | 5  |  |
| 184               | 0       | 0,00 |                     |                     |        | A 1               |          | S        | Ackerkrume der<br>Pararendzina                                                        | SB Krümel, Krotow.                                                                      | K 0,5-3,0                 | 4          | 0,1      | 4W/R<br>1W/2R  | 1,0-2,0         | A X    | 0,03                   | 3G/3E                | 5      | 5                | 39              | 45                    | 115   | L1-120         |       |    |    |    |                        |    |    |      |      |                   |      |      |     | L1     | L1-4%            |             |    |  |
|                   | 1       | 0,25 |                     |                     |        | A 2               |          | dSB/GB   | LÖß                                                                                   |                                                                                         | K/B                       | 2          | 0,1-0,3  | 2W/2R          | 2,0-3,0         | A Ø    | 0,04                   | 3L Ø 0,03            | 5      | 4F               | 38              | 43                    | 113   | L2-120         |       |    |    |    |                        |    |    |      |      |                   |      |      |     | L2     |                  |             |    |  |
|                   |         | 0,55 |                     |                     |        | A 4               |          | 1GB      | LÖß                                                                                   |                                                                                         |                           |            |          | 4W/3R          | 2,0             |        |                        |                      |        |                  |                 |                       |       |                |       |    |    |    |                        |    |    |      |      |                   |      |      | L3  | L3-20% |                  |             |    |  |
|                   | 2       | 2,00 |                     |                     |        | B 1               |          |          | Zwischenschicht mit<br>verstreutem Quarz,<br>Pläner u. Basalt<br>Kleinschluff bis 2cm |                                                                                         |                           |            |          | 4W/4R          | 1,0-2,0         |        | 0,04                   | 2L Ø 0,03            | 3      | 4F               | 31              | 48                    | 155   | L3-120         |       |    |    |    |                        |    |    |      |      |                   |      |      | L4  |        |                  |             |    |  |
|                   |         |      |                     |                     |        | B 2               |          |          |                                                                                       |                                                                                         |                           |            |          |                |                 | A Ø    | 0,02                   | 2L Ø 0,02            | 1L     | 4F               | 30              | 50                    | 167   | L4-70          |       |    |    |    |                        |    |    |      |      |                   |      |      | L5  |        |                  |             |    |  |
|                   | 3       | 2,90 |                     |                     |        | B 3               |          |          | Verstreuter Pläner-<br>schutt u. Quarzger.                                            |                                                                                         | B 100                     | 4          | 0,3      | 4R             | 1,0-2,0         |        | 0,02                   | 2L Ø 0,02            | 3L     | 4F               | 33              | 48                    | 146   | L5-65          |       |    |    |    |                        |    |    |      |      |                   |      |      | L6  |        |                  |             |    |  |
|                   |         |      |                     |                     |        | B 4               |          |          |                                                                                       |                                                                                         |                           |            |          |                |                 | A X    | 0,04                   | 2L Ø 0,03            | 2L     | 4F, M            | 42              | 43                    | 103   | L6-70          |       |    |    |    |                        |    |    |      |      |                   |      |      | L7  |        |                  |             |    |  |
|                   |         |      |                     |                     |        | B 5               |          |          |                                                                                       |                                                                                         |                           |            |          |                |                 |        |                        |                      |        |                  |                 |                       |       |                |       |    |    |    |                        |    |    |      |      |                   |      |      | L8  |        |                  |             |    |  |
|                   |         |      |                     |                     |        | B 6               |          | GB       |                                                                                       | Häufig Pläner, Quarz,<br>Basalt. Lockere lin-<br>senförm. Kleinschluff<br>Einlagerungen |                           |            |          |                |                 | P X    | 0,05-0,5               | 2L Ø 0,05-0,2        | 2L     | 4F               | 53              | 26                    | 49    | L7-130         |       |    |    |    |                        |    |    |      |      |                   |      |      | L9  |        |                  |             |    |  |
|                   |         |      |                     |                     |        | B 7               |          | (Gr)GB   |                                                                                       |                                                                                         |                           |            |          |                |                 | A X    | 0,05                   | 2L Ø 0,03            | 2L     | 4F               |                 |                       |       |                |       |    |    |    |                        |    |    |      |      |                   |      |      | L10 |        |                  |             |    |  |
|                   | 4       | 4,10 |                     |                     |        | C 1               |          | d(Gr)GB  | Schwache Bodenbildung                                                                 |                                                                                         | (F) 0,2                   | 4          | 0,05-0,2 | 4R             | 1,0             | P/A X  | 0,2/0,05               | 2E Ø 0,03            | 3      | 4F, 3M           | 50              | 34                    | 68    | L8-(70)        |       |    |    |    |                        |    |    |      |      |                   |      |      | L11 |        |                  |             |    |  |
|                   |         |      |                     |                     |        | C 2               |          | GB       |                                                                                       |                                                                                         | K 1,0                     | 4          | 0,1-0,2  |                |                 | A X    |                        |                      | 1      | 1F, 4M           | 60              | 25                    | 42    | L9-(75)        |       |    |    |    |                        |    |    |      |      |                   |      |      | L12 |        |                  |             |    |  |
|                   |         |      |                     |                     |        | C 3               |          | dGB      | Schwache Bodenbildung                                                                 | Kleine Spalten mit<br>Feinaggregat Gefüge                                               | F 0,2                     | 3          | 0,1-0,2  | 5              | ~               | AP Ø   | 0,1/0,03               | 3E Ø 0,04            | 3      | 1F, 4M           | 58              | 27                    | 47    | (95) L10       |       |    |    |    |                        |    |    |      |      |                   |      |      | L13 |        |                  |             |    |  |
|                   |         |      |                     |                     |        | C 4               |          | (Gr)GB   | Sandiger Lehm                                                                         |                                                                                         | K 0,5-2,0                 | 4          | 0,1-0,3  | 4R             | 1,0-2,0         | P/A X  | 0,5/0,04               | 4E                   | 1      | 2F, 4M           |                 |                       |       |                |       |    |    |    |                        |    |    |      |      |                   |      | L14  |     |        |                  |             |    |  |
|                   |         |      |                     |                     |        | C 5               |          | dGrB     | Bodenb. - Rendzina                                                                    | Lichter Ca-Horizont                                                                     | F 0,1-0,2                 | 2          | 0,1-0,3  |                |                 | P Ø    | 0,1                    | 4E/25                | 5      | 4F, 4M           |                 |                       |       |                |       |    |    |    |                        |    |    |      |      |                   |      | L15  |     |        |                  |             |    |  |
|                   |         |      |                     |                     |        | C 6               |          | dGB      | LÖß                                                                                   | Kleinschluff                                                                            | K 1,0-2,5                 | 3          | 0,1-0,3  | 5              | ~               | A X    | 0,02                   | 3E Ø 0,04            | 1      | 4F, 2M           | 56              | 30                    | 54    | L11-(120)      |       |    |    |    |                        |    |    |      |      |                   |      |      | L16 |        |                  |             |    |  |
|                   |         |      |                     |                     |        | D 1               |          | dGr      | Bodenb. - Rendzina                                                                    | Spalten mit Feinagr.                                                                    | F 0,2                     | 4          | 0,1-0,2  | 5              | 1,0             | A 0,02 | 25 Ø 0,02              |                      | 3F, 3M | 58               | 30              | 52                    | L12-~ |                |       |    |    |    |                        |    |    |      |      |                   |      | L17  |     |        |                  |             |    |  |
|                   |         |      |                     |                     |        | D 2               |          | (Gr)1GrB | mergeliger Lehm                                                                       | SB Krümel                                                                               | K 2,0-3,0                 | 4          | 0,2-0,3  | 5              |                 | A X    | 0,10-0,05              | 4E                   | 5      | 2F, 3M           | 60              | 30                    | 50    | L13-(70)       |       |    |    |    |                        |    |    |      |      |                   |      |      | L18 |        |                  |             |    |  |
|                   |         |      |                     |                     |        | D 3               |          | S        | Bodenb. - Rendzina                                                                    | Spalten mit Feinagr.                                                                    | K 2,0-4,0                 | 3          | 0,1-0,3  | 4W/3R          | 3,0/1,0         | A Ø    | 0,04                   | 25                   |        | 3F, 3M           | 47              | 33                    | 70    | L14-(70)       |       |    |    |    |                        |    |    |      |      |                   |      |      | L19 |        |                  |             |    |  |
|                   |         |      |                     |                     |        | D 4               |          | dSGr     |                                                                                       | SGr-Bröckchen, d-Flecke                                                                 | (K)F 1,0/0,3              | 3          | 0,1-0,2  | 3R             | 1,0             | A Ø    | 0,04                   | 2E Ø 0,02            |        | 2F, 3M           | 63              | 27                    | 43    | L15-(80)       |       |    |    |    |                        |    |    |      |      |                   |      |      | L20 |        |                  |             |    |  |
|                   |         |      |                     |                     |        | D 5               |          | WG       | mergeliger Lehm,<br>lockerer                                                          |                                                                                         | K 0,5-3,0                 | 4          | 0,1-0,2  | 3R             |                 | A Ø    | 0,04                   | 3E Ø 0,03            | 5      | 3F, 3M           | 51              | 34                    | 67    | L16-(80)       |       |    |    |    |                        |    |    |      |      |                   |      |      | L21 |        |                  |             |    |  |
|                   |         |      |                     |                     |        | D 6               |          | 1WG      | merg. Lehm, dichter                                                                   |                                                                                         | K 1,0-5,0                 | 3          | 0,1-0,2  | 4R             | 1,0             | A Ø    | 0,04                   | 4E Ø 0,02            | 2      | 3F, 2M           | 41              | 35                    | 85    | L17-85         |       |    |    |    |                        |    |    |      |      |                   |      |      | L22 |        |                  |             |    |  |
|                   |         |      |                     |                     |        | D 7               |          | 1WG      | merg. Lehm, dichter                                                                   | Tonige Zwischensch.<br>mit Kleinschluff.                                                | E 1,0-3,0                 | 4          | 0,1-0,2  | 5              | ~               | PA =   | 0,5/0,06               | 3L Ø 0,04            | 3      | 4F, 3M           | 34              | 31                    | 91    | L18-85         |       |    |    |    |                        |    |    |      |      |                   |      |      | L23 |        |                  |             |    |  |
|                   |         |      |                     |                     |        | D 8               |          | 1WG      | merg. Lehm, dichter                                                                   |                                                                                         | (P) 5-10                  | 4          | 0,1-0,2  |                |                 | L X    | ~                      | 4GE Ø 0,05           | 2      | 1F, 2M           | 49              | 31                    | 63    | L19-100        |       |    |    |    |                        |    |    |      |      |                   |      |      | L24 |        |                  |             |    |  |
|                   |         |      |                     |                     |        | D 9               |          | 1GrB     | merg. Lehm, humos                                                                     | Scharfkantige unver-<br>witterte Plänersplinter                                         | ~                         | 4          | 0,1-0,2  | 5              | ~               |        |                        |                      |        | 2F, 2M           | 207             | 35                    | 85    | L20-~          |       |    |    |    |                        |    |    |      |      |                   |      | L25  |     |        |                  |             |    |  |
|                   |         |      |                     |                     |        | D 10              |          | 1GrB     |                                                                                       |                                                                                         | ~                         | 4          | 0,1-0,2  |                |                 |        |                        |                      |        |                  |                 |                       |       |                |       |    |    |    |                        |    |    |      |      |                   |      | L26  |     |        |                  |             |    |  |
|                   |         |      |                     |                     |        | D 11              |          | GrB      | Bodenbild.-Profilen.                                                                  |                                                                                         | P/F 5/0,1                 | 3          | 0,2-0,3  | 3R             | 1,0             | LAX    | 0,02                   | 3S Ø 0,02            | 3      | 3F, 4M           | 58              | 23                    | 40    | L21-85         |       |    |    |    |                        |    |    |      |      |                   |      |      | L27 |        |                  |             |    |  |
|                   |         |      |                     |                     |        | D 12              |          | 1GrB     | sandig merg. Lehm                                                                     |                                                                                         | P 3-10                    | 4          | 0,1-0,3  | 4R             | 1,0-3,0         | L X    | ~                      | 4GE Ø 0,01-0,1       | 5      | 4F, 4M           | 55              | 26                    | 47    | L22-85         |       |    |    |    |                        |    |    |      |      |                   |      |      | L28 |        |                  |             |    |  |
|                   |         |      |                     |                     |        | D 13              |          | S        | Bodenb. - Rendzina                                                                    | Wgr Schlieren aus um-<br>gel. Ca-horizont                                               | F 0,1                     | 3          | 0,1-0,3  | 5              | ~               | A Ø    | 0,03                   | 2S Ø 0,02            | 1      | 4F, 4M           | 46              | 36                    | 78    | L23-90         |       |    |    |    |                        |    |    |      |      |                   |      |      | L29 |        |                  |             |    |  |
|                   |         |      |                     |                     |        | D 14              |          |          |                                                                                       |                                                                                         | E ~                       | 3          | 0,1-0,3  | 3R             | 1,0             | A Ø    | 0,1/0,05               | 2L/4E                | 2L     | 3F, 4M           | 48              | 37                    | 77    | L24-90         |       |    |    |    |                        |    |    |      |      |                   |      |      | L30 |        |                  |             |    |  |
|                   |         |      |                     |                     |        | D 15              |          | (Gr)GB   | LÖß                                                                                   | Häufige stark ver-<br>witterte Plänerspl.                                               | (K)B 1-3/100              | 3          | 0,2-0,3  | 4R             | 1,0             | A X    | 0,1/0,05               | 2L/3E                | 1L     | 2F, 2M           | 48              | 32                    | 67    | L25-90         |       |    |    |    |                        |    |    |      |      |                   |      |      | L31 |        |                  |             |    |  |
|                   |         |      |                     |                     |        | D 16              |          |          |                                                                                       |                                                                                         |                           |            |          |                |                 |        |                        |                      |        |                  |                 |                       |       |                |       |    |    |    |                        |    |    |      |      |                   |      |      | L32 |        |                  |             |    |  |
|                   |         |      |                     |                     |        | D 17              |          |          |                                                                                       |                                                                                         |                           |            |          |                |                 |        |                        |                      |        |                  |                 |                       |       |                |       |    |    |    |                        |    |    |      |      |                   |      |      | L33 |        |                  |             |    |  |
|                   |         |      |                     |                     |        | D 18              |          |          |                                                                                       |                                                                                         |                           |            |          |                |                 |        |                        |                      |        |                  |                 |                       |       |                |       |    |    |    |                        |    |    |      |      |                   |      |      | L34 |        |                  |             |    |  |
|                   |         |      |                     |                     |        | D 19              |          |          |                                                                                       |                                                                                         |                           |            |          |                |                 |        |                        |                      |        |                  |                 |                       |       |                |       |    |    |    |                        |    |    |      |      |                   |      |      | L35 |        |                  |             |    |  |
|                   |         |      |                     |                     |        | D 20              |          |          |                                                                                       |                                                                                         |                           |            |          |                |                 |        |                        |                      |        |                  |                 |                       |       |                |       |    |    |    |                        |    |    |      |      |                   |      |      | L36 |        |                  |             |    |  |
|                   |         |      |                     |                     |        | D 21              |          |          |                                                                                       |                                                                                         |                           |            |          |                |                 |        |                        |                      |        |                  |                 |                       |       |                |       |    |    |    |                        |    |    |      |      |                   |      |      | L37 |        |                  |             |    |  |
|                   |         |      |                     |                     |        | D 22              |          |          |                                                                                       |                                                                                         |                           |            |          |                |                 |        |                        |                      |        |                  |                 |                       |       |                |       |    |    |    |                        |    |    |      |      |                   |      |      | L38 |        |                  |             |    |  |
|                   |         |      |                     |                     |        | D 23              |          |          |                                                                                       |                                                                                         |                           |            |          |                |                 |        |                        |                      |        |                  |                 |                       |       |                |       |    |    |    |                        |    |    |      |      |                   |      |      | L39 |        |                  |             |    |  |
|                   |         |      |                     |                     |        | D 24              |          |          |                                                                                       |                                                                                         |                           |            |          |                |                 |        |                        |                      |        |                  |                 |                       |       |                |       |    |    |    |                        |    |    |      |      |                   |      |      | L40 |        |                  |             |    |  |
|                   |         |      |                     |                     |        | D 25              |          |          |                                                                                       |                                                                                         |                           |            |          |                |                 |        |                        |                      |        |                  |                 |                       |       |                |       |    |    |    |                        |    |    |      |      |                   |      |      | L41 |        |                  |             |    |  |
|                   |         |      |                     |                     |        | D 26              |          |          |                                                                                       |                                                                                         |                           |            |          |                |                 |        |                        |                      |        |                  |                 |                       |       |                |       |    |    |    |                        |    |    |      |      |                   |      |      | L42 |        |                  |             |    |  |
|                   |         |      |                     |                     |        | D 27              |          |          |                                                                                       |                                                                                         |                           |            |          |                |                 |        |                        |                      |        |                  |                 |                       |       |                |       |    |    |    |                        |    |    |      |      |                   |      |      | L43 |        |                  |             | </ |  |

Wurm Exkrem.

Ca-Horizont des Bodens F3 über-  
deckt die ältere  
teilweise decalci-  
fierte Schicht G1  
(Vergl. Kol. 21, 27, 30)

Wurm Exkrem.
